## The effects of different preventive counseling programs on anxiety and depression symptoms in patients with paroxysmal atrial fibrillation after catheter ablation

N. Pogossova<sup>1</sup>, A.I. Ovchinnikova<sup>2</sup>, Y.M. Yufereva<sup>1</sup>, O.Y. Sokolova<sup>1</sup>, K.V. Davtyan<sup>3</sup>

<sup>1</sup>National Medical Research Center of Cardiology, Moscow, Russian Federation; <sup>2</sup>Federal State Budgetary Institution "9 Diagnostic and Treatment Center" of the Ministry of Defense, Moscow, Russian Federation; <sup>3</sup>National Center for Preventive Medicine, Moscow, Russian Federation

**Funding Acknowledgement:** Type of funding source: None

**Background:** Depression and anxiety are common in patients (pts) with atrial fibrillation (AF). These psychosocial risk factors add to the symptoms burden and further deteriorate the quality of life.

**Purpose:** To assess the effects of different preventive counseling programs on anxiety and depression symptoms in pts after catheter ablation (CA) performed for paroxysmal AF.

**Methods:** This is a prospective randomized controlled study with 3 parallel groups of pts with paroxysmal AF after CA (radiofrequency or cryoablation). Pts were randomized into 3 groups in 1:1:1 ratio. During hospitalization for CA pts from all groups received single-session preventive counseling with focus on their individual cardiovascular risk factors profile. After discharge pts from Group 1 received remote preventive counseling by phone and

pts from Group 2 – by email every two weeks for the first 3 months after enrollment (a total of 6 sessions). Group 3 received usual care. All pts underwent anxiety and depression assessment using Hospital Anxiety and Depression Scale (HADS) at baseline and at 12 months.

**Results:** A total of 135 pts aged 35 to 80 years were enrolled (mean age 57.3±9.1 years, 51.8% men). The groups were well balanced according to demographic and clinical features. At 1 year of follow-up there was a significant decrease in anxiety and depression scores as measured by HADS in both intervention groups vs. control (Table).

**Conclusions:** Preventive counseling followed by 3 months of remote support via phone and email reduced anxiety and depression level in AF pts after CA.

Anxiety and depression symptoms changes

|                                                    | Group 1<br>(support via phone) | Group 2<br>(support via e-mail) | Control group      | P for change from baseline,<br>1 group vs. control | P for change from baseline,<br>2 group vs. control |
|----------------------------------------------------|--------------------------------|---------------------------------|--------------------|----------------------------------------------------|----------------------------------------------------|
| Changes in anxiety symptoms according to HADS-A    |                                |                                 |                    |                                                    |                                                    |
| Baseline, Me (25%; 75%)                            | 8 (4; 10.5)                    | 7 (4; 8)                        | 7 (5.5; 10)        | n/s                                                | n/s                                                |
| At 12 months, Me (25%; 75%)                        | 3 (1.5; 5)**                   | 4 (2; 5)**                      | 7 (5; 9.5)         | <0.001                                             | <0.001                                             |
| Δ% after 12 months, Me (25%; 75%)                  | -50.0 (-77.8; -24.0)           | -40.0 (-57.1; -20.0)            | -9.1 (-17.8; 16.1) | <0.001                                             | <0.001                                             |
| Changes in depression symptoms according to HADS-D |                                |                                 |                    |                                                    |                                                    |
| Baseline, Me (25%; 75%)                            | 5 (3.5; 7)                     | 4 (2; 5)                        | 6 (3.5; 8)         | n/s                                                | <0.05                                              |
| At 12 months, Me (25%; 75%)                        | 3 (1; 4)**                     | 3 (2; 4)**                      | 5 (3; 8)*          | <0.001                                             | <0.001                                             |
| Δ% after 12 months, Me (25%; 75%)                  | -46.4 (-75.0; 0)               | -30.9 (-51.8; 0)                | -10.0 (-31.3; 0)   | <0.001                                             | <0.05                                              |

\*p<0.05 vs baseline; \*\*p<0.001 vs baseline.
